# Supplementary material
Source: PubMed Central journal article supplement (PMC1904154)
Supplement: pnas_0611523104_5.pdf [file pnas_0611523104_5.pdf]

**Table 3. Terminal body and carcass weights in *III8<sup>-/-</sup>* and WT mice**

|                    | Female       |                                   |              |                                    | Male         |                                    |              |                                   |
|--------------------|--------------|-----------------------------------|--------------|------------------------------------|--------------|------------------------------------|--------------|-----------------------------------|
|                    | Young adult  |                                   | Mature       |                                    | Young adult  |                                    | Mature       |                                   |
|                    | WT, n = 7    | <i>III8<sup>-/-</sup></i> , n = 8 | WT, n = 5    | <i>III8<sup>-/-</sup></i> , n = 10 | WT, n = 7    | <i>III8<sup>-/-</sup></i> , n = 11 | WT, n = 6    | <i>III8<sup>-/-</sup></i> , n = 6 |
| Body weight, g*    | 19.76 ± 0.42 | 22.74 ± 0.97                      | 23.30 ± 0.20 | 29.31 ± 1.24                       | 26.42 ± 0.96 | 30.34 ± 1.13                       | 30.88 ± 1.84 | 35.80 ± 1.15                      |
| Carcass weight, g* | 14.96 ± 0.41 | 18.13 ± 1.13                      | 17.03 ± 0.53 | 23.07 ± 1.42                       | 20.84 ± 0.92 | 25.2 ± 0.83                        | 23.75 ± 1.49 | 29.47 ± 1.22                      |

Data express mean ± SEM. Whole bodies and eviscerated decapitated carcasses from *III8<sup>-/-</sup>* mice were heavier in male and female *III8<sup>-/-</sup>* mice as compared to WT controls by young adulthood (18 weeks), continuing into maturity (males: 35 weeks, females: 28 weeks of age). Values for male and female *III8<sup>-/-</sup>* (\*) were greater than respective WT mice.  $P < 0.05$  (Student's and Welch's *t* tests for groups with equal and unequal variance, respectively).
