# Supplementary material
Source: PubMed Central journal article supplement (PMC1904154)

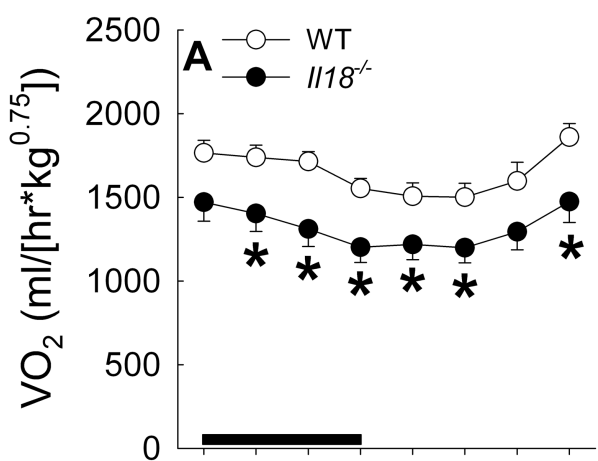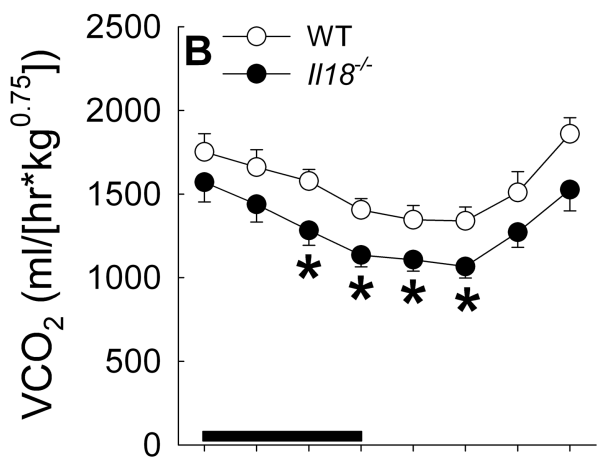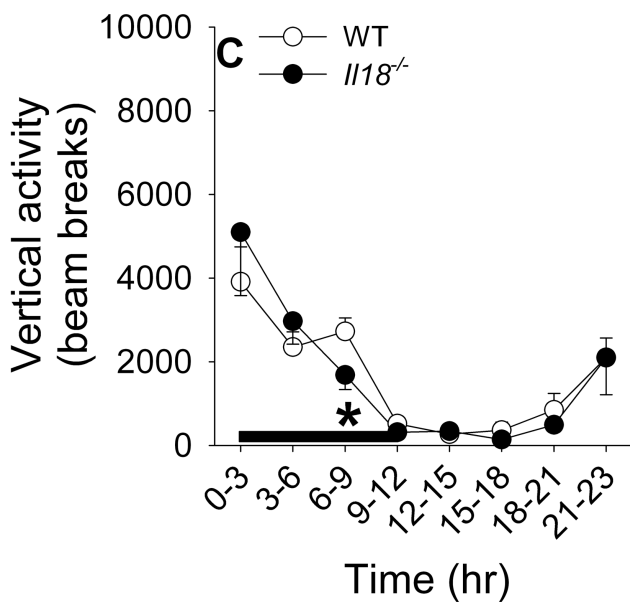

Supplement: pnas_0611523104_1.pdf [file pnas_0611523104_1.pdf]

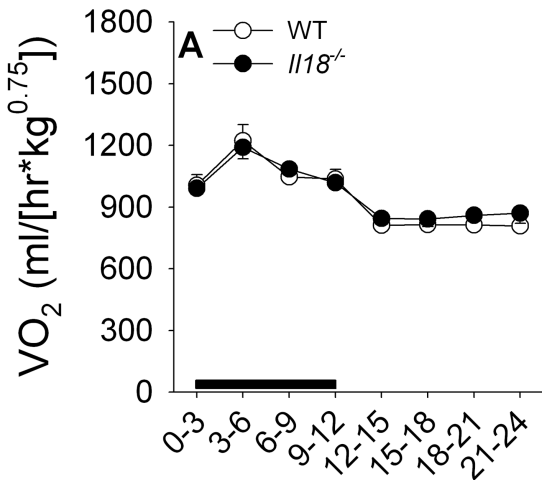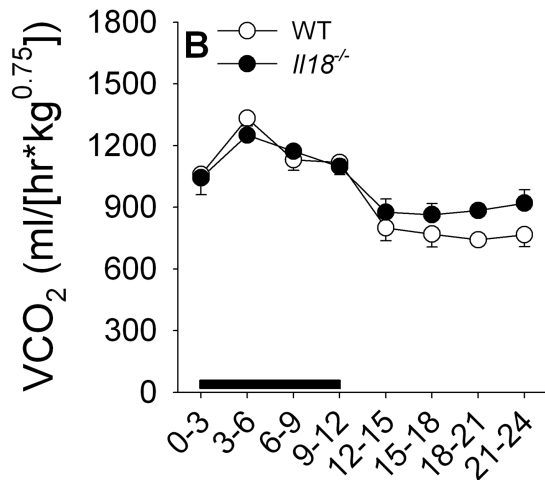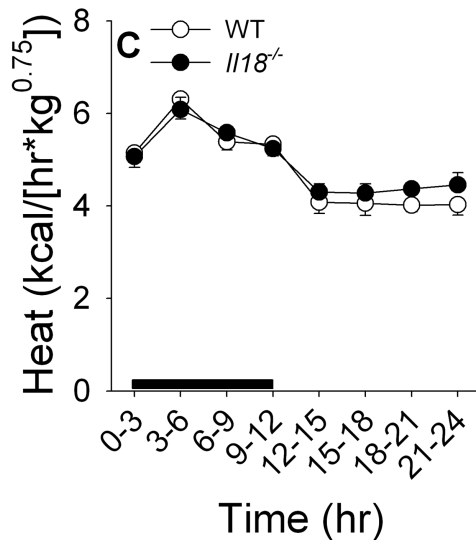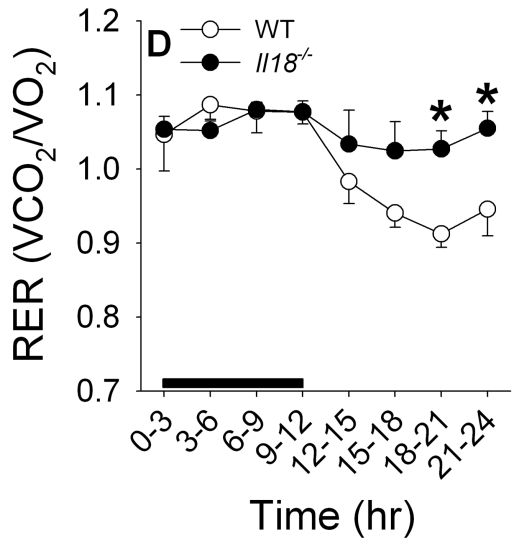

Supplement: pnas_0611523104_2.pdf [file pnas_0611523104_2.pdf]

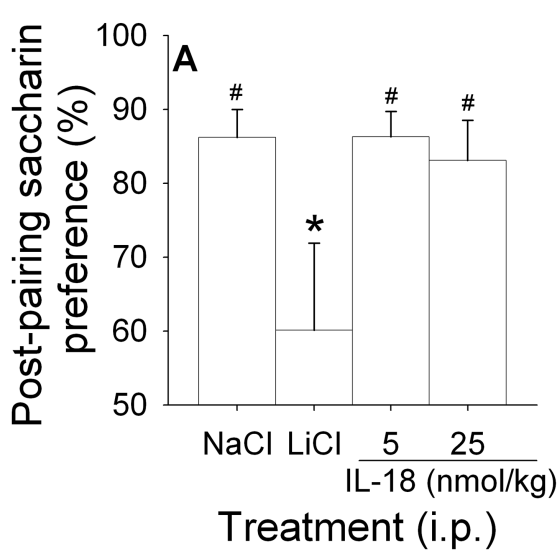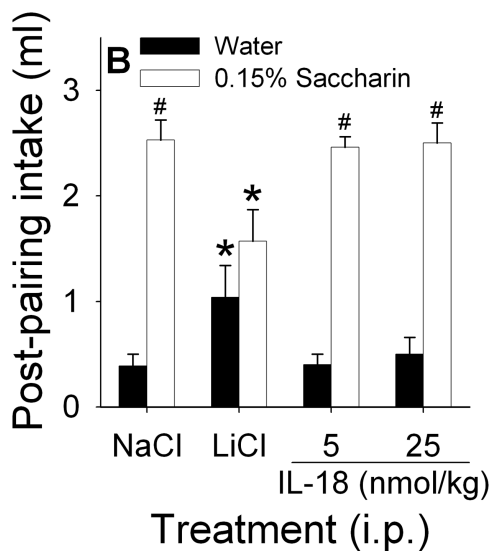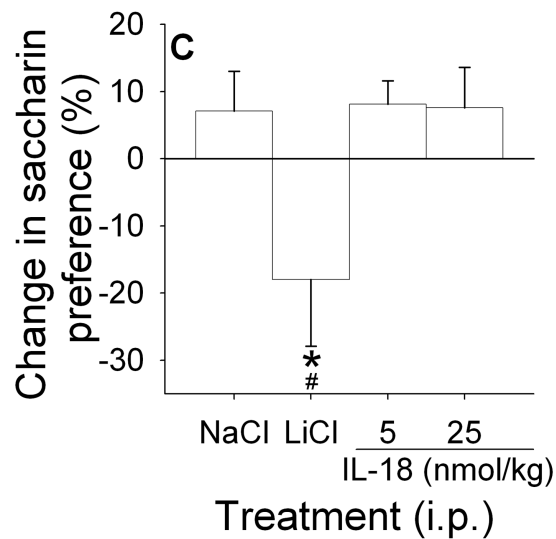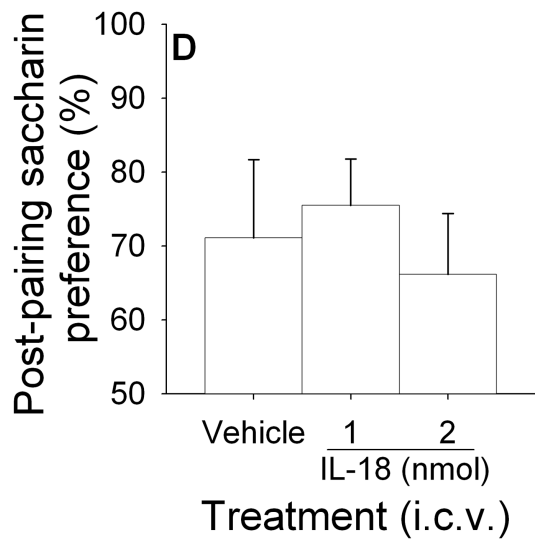

Supplement: pnas_0611523104_3.pdf [file pnas_0611523104_3.pdf]

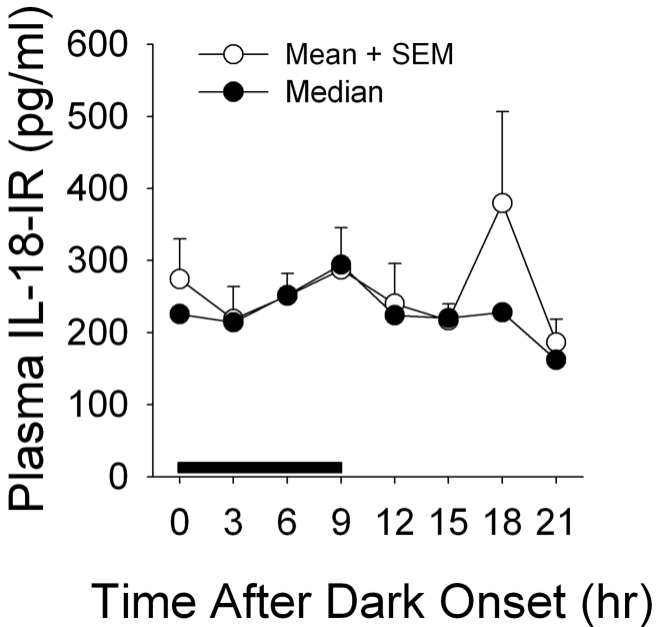

Supplement: pnas_0611523104_4.pdf [file pnas_0611523104_4.pdf]
